# Supplementary material
Source: publisher figshare collection journal article supplement (https://sage.figshare.com/ndownloader/files/17890217)
Supplement: Supplementary file 1 [file 17890217]

## Sheet: All groups, weighted
1-year TPs (year 0-3)
	To Abs, est	To Abs, lb	To Abs, ub	To Low, est	To Low, lb	To Low, ub	To Med, est	To Med, lb	To Med, ub	To High, est	To High, lb	To High, ub	To Very High, est	To Very High, lb	To Very High, ub
From Abs	0.932962	0.913291	0.949814	0.0573468	0.0427933	0.0745058	0.00617687	0.00230776	0.0124583	0.00040621	4.89999e-05	0.00121471	0.00310839	0.000548748	0.0081324
From Low	0.0900889	0.0654641	0.117832	0.810463	0.77353	0.845023	0.0502324	0.0328305	0.0718137	0.0223687	0.011366	0.0377115	0.0268471	0.0156129	0.0420811
From Med	0.0028407	0.000765901	0.00679009	0.316913	0.239163	0.401186	0.487622	0.388696	0.584693	0.187857	0.130606	0.255702	0.00476773	0.00137783	0.0103264
From High	0.0323372	0.0124628	0.0636424	0.109423	0.0563243	0.17834	0.125387	0.0797961	0.180649	0.510364	0.399365	0.620013	0.222488	0.139151	0.321954
From Very High	0.071821	0.0419433	0.111225	0.0977966	0.0611847	0.143832	0.0774021	0.048202	0.115049	0.122056	0.0800531	0.173055	0.630925	0.552554	0.706022
1-year TPs (year 3-8)
	To Abs, est	To Abs, lb	To Abs, ub	To Low, est	To Low, lb	To Low, ub	To Med, est	To Med, lb	To Med, ub	To High, est	To High, lb	To High, ub	To Very High, est	To Very High, lb	To Very High, ub
From Abs	0.931819	0.910712	0.950027	0.0482815	0.0335761	0.0656679	0.0099	0.00358293	0.0191541	0	5.75185e-261	8.75484e-06	0.01	0.0036294	0.0195756
From Low	0.0689493	0.0481608	0.0939186	0.800635	0.762483	0.835846	0.01	0.00305137	0.0216337	0.0498285	0.0314176	0.0722094	0.0705869	0.0485569	0.096322
From Med	0.0124476	0.000615001	0.0421464	0.262788	0.190381	0.344847	0.480061	0.383323	0.576667	0.2143	0.146667	0.294754	0.0304044	0.00590433	0.074732
From High	0.0620879	0.0229185	0.122657	0.0724545	0.0315097	0.129174	0.146771	0.0884371	0.220272	0.452429	0.346145	0.561557	0.266258	0.17397	0.366905
From Very High	0.122023	0.0758596	0.179199	0.0312378	0.0118252	0.063842	0.130293	0.0827239	0.187333	0.0875621	0.0519414	0.134481	0.628885	0.549272	0.704429
1-year TPs (year 8+)
	To Abs, est	To Abs, lb	To Abs, ub	To Low, est	To Low, lb	To Low, ub	To Med, est	To Med, lb	To Med, ub	To High, est	To High, lb	To High, ub	To Very High, est	To Very High, lb	To Very High, ub
From Abs	0.942932	0.924371	0.958728	0.0570681	0.0412408	0.0756107	0	5.42057e-259	1.55811e-05	0	9.91197e-246	8.86545e-06	0	7.21054e-250	1.73367e-05
From Low	0.0426539	0.0269467	0.0629048	0.820457	0.782808	0.854561	0.0199957	0.00892549	0.0348617	0.0733542	0.0510731	0.0991962	0.0435389	0.0267772	0.0636936
From Med	0.0101478	0.000208796	0.0392472	0.255374	0.1793	0.34558	0.422899	0.325804	0.523514	0.15596	0.0936155	0.230767	0.155619	0.0899198	0.237012
From High	0.0313499	0.00657017	0.0782933	0.091547	0.0391905	0.163627	0.136732	0.0854541	0.205454	0.46954	0.363914	0.576869	0.270831	0.178195	0.370223
From Very High	0.203413	0.143537	0.271047	0.026713	0.00710551	0.0587863	0.242467	0.178247	0.312909	0.0963108	0.0585144	0.145278	0.431097	0.35284	0.510602

## Sheet: 18-35 White Male
3-year TPs (year 0-3)
	To Abs	To Low	To Med	To High	To Very High
From Abs	0.6288	0.3438	0.0154	0.0034	0.0086
From Low	0.1367	0.7464	0.0479	0.0398	0.0292
From Med	0.0379	0.3116	0.0854	0.5431	0.022
From High	0.3114	0.2751	0.0507	0.0193	0.3435
From Very High	0.1316	0.4122	0.0581	0.1297	0.2684
1-year TPs (year 0-3)
	To Abs, est	To Abs, lb	To Abs, ub	To Low, est	To Low, lb	To Low, ub	To Med, est	To Med, lb	To Med, ub	To High, est	To High, lb	To High, ub	To Very High, est	To Very High, lb	To Very High, ub
From Abs	0.847306	0.819063	0.874628	0.14559	0.119352	0.17438	1e-05	3.09821e-287	1.41289e-05	2.22352e-17	5.25151e-297	1.01861e-05	0.00709424	0.00190877	0.0153998
From Low	0.0542848	0.0346743	0.0762605	0.894551	0.863777	0.920943	0.0276677	0.0146426	0.0454572	0.016475	0.00705778	0.0306996	0.00702141	0.00140553	0.0169269
From Med	2.92369e-17	0	1.01821e-17	0.0848944	0.0359303	0.145839	0.47421	0.367337	0.575646	0.440885	0.334064	0.545655	1.04207e-05	0	2.45998e-13
From High	0.136446	0.0708039	0.218168	0.10385	0.0473502	0.17826	1.01136e-05	0	3.83768e-16	0.551383	0.430808	0.662858	0.208311	0.12884	0.302508
From Very High	0.0611259	0.0300843	0.105714	0.201918	0.138555	0.272547	0.066942	0.0321741	0.113078	0.0222049	0.00470441	0.0503172	0.647809	0.561197	0.726258
1-year TPs (year 3-8)
	To Abs, est	To Abs, lb	To Abs, ub	To Low, est	To Low, lb	To Low, ub	To Med, est	To Med, lb	To Med, ub	To High, est	To High, lb	To High, ub	To Very High, est	To Very High, lb	To Very High, ub
From Abs	0.856053	0.826695	0.884416	0.124047	0.0965455	0.150793	0.0099	0.00351969	0.0185096	0	2.53331e-277	6.11475e-06	0.01	0.00362229	0.019018
From Low	0.034606	0.0202334	0.0536209	0.863393	0.832043	0.893826	0.01	0.00293813	0.0214716	0.0419583	0.0254027	0.0634751	0.0500429	0.0313386	0.0710116
From Med	0.0112073	0.000381842	0.0419098	0.0584877	0.0197026	0.118666	0.456508	0.359198	0.554989	0.444103	0.345716	0.542647	0.0296941	0.00479809	0.0707915
From High	0.169474	0.0935614	0.265906	0.0584141	0.0192691	0.120734	0.0248699	0.00234268	0.0672632	0.494674	0.383959	0.613973	0.252568	0.154552	0.348849
From Very High	0.115382	0.0689415	0.174362	0.0774821	0.0397264	0.126492	0.125103	0.0784605	0.18424	0.0209599	0.00448197	0.0519189	0.661073	0.582675	0.738297
1-year TPs (year 8+)
	To Abs, est	To Abs, lb	To Abs, ub	To Low, est	To Low, lb	To Low, ub	To Med, est	To Med, lb	To Med, ub	To High, est	To High, lb	To High, ub	To Very High, est	To Very High, lb	To Very High, ub
From Abs	0.863893	0.834319	0.888337	0.136107	0.111494	0.165681	0	3.41925e-272	1.24647e-05	0	7.04802e-292	4.75041e-06	0	5.47415e-272	1.46042e-05
From Low	0.0143637	0.00557149	0.0279502	0.870483	0.837491	0.900024	0.0199962	0.00956015	0.0354374	0.0614906	0.0404044	0.0839342	0.0336669	0.0187891	0.0523795
From Med	0.0102159	0.000226178	0.0398906	0.105991	0.0533226	0.170897	0.411361	0.305167	0.513079	0.315962	0.221812	0.416066	0.156471	0.0912564	0.240741
From High	0.0822436	0.0317068	0.149532	0.072935	0.0257812	0.14511	0.0119995	0.000239963	0.0450761	0.555191	0.444745	0.659347	0.277631	0.185185	0.376638
From Very High	0.210989	0.148954	0.27716	0.0265657	0.00741211	0.0585127	0.249079	0.186755	0.318434	0.0302243	0.0103863	0.0634694	0.483142	0.402149	0.558459

## Sheet: 18-35 Black Male
3-year TPs (year 0-3)
	To Abs	To Low	To Med	To High	To Very High
From Abs	0.7848	0.1878	0.0154	0.0034	0.0086
From Low	0.1595	0.7198	0.0444	0.0451	0.0312
From Med	0.1525	0.7231	0.0138	0.0886	0.022
From High	0.1155	0.3935	0.0144	0.1568	0.3198
From Very High	0.1391	0.4524	0.1144	0.0574	0.2367
1-year TPs (year 0-3)
	To Abs, est	To Abs, lb	To Abs, ub	To Low, est	To Low, lb	To Low, ub	To Med, est	To Med, lb	To Med, ub	To High, est	To High, lb	To High, ub	To Very High, est	To Very High, lb	To Very High, ub
From Abs	0.91635	0.890467	0.937915	0.0738636	0.0548014	0.0996551	0.00583526	0.00149269	0.0142053	0	0	5.88996e-06	0.00395156	0.000660224	0.0107512
From Low	0.0660573	0.0456494	0.0908019	0.872143	0.840447	0.901232	0.0215558	0.0102675	0.0365289	0.0402336	0.0235156	0.0615825	1.00003e-05	0	2.8418e-06
From Med	0.0477292	0.0153455	0.101302	0.6693	0.571175	0.764567	0.227115	0.142307	0.321655	0.0558564	0.0180304	0.114291	0	0	2.75799e-15
From High	0.0250114	0.00297722	0.066818	0.16503	0.0866862	0.248012	0	0	6.02491e-16	0.492632	0.384789	0.605715	0.317327	0.218774	0.431694
From Very High	0.0558106	0.0244639	0.0955368	0.17229	0.114893	0.238989	0.125182	0.0752851	0.183713	0.0327752	0.0107149	0.0683927	0.613942	0.530635	0.692824
1-year TPs (year 3-8)
	To Abs, est	To Abs, lb	To Abs, ub	To Low, est	To Low, lb	To Low, ub	To Med, est	To Med, lb	To Med, ub	To High, est	To High, lb	To High, ub	To Very High, est	To Very High, lb	To Very High, ub
From Abs	0.926244	0.903683	0.944937	0.0538561	0.0375535	0.0741016	0.0099	0.00385188	0.0200209	0	9.435e-294	1.15038e-05	0.01	0.00385745	0.0198524
From Low	0.0447582	0.0279857	0.0665494	0.829497	0.79456	0.86334	0.01	0.00315861	0.0207281	0.0657985	0.0424551	0.091889	0.0499463	0.0335476	0.0753514
From Med	0.0266412	0.00445536	0.070367	0.60648	0.508662	0.704902	0.249309	0.168107	0.341541	0.0880662	0.0423898	0.148593	0.0295032	0.00543868	0.0698786
From High	0.0487994	0.0128784	0.0994424	0.119317	0.0569742	0.206297	0.0244063	0.00222498	0.0710131	0.438511	0.329415	0.548824	0.368966	0.264653	0.484436
From Very High	0.111871	0.0660307	0.167988	0.059815	0.0281176	0.106428	0.176374	0.114691	0.238649	0.020825	0.00423609	0.0507916	0.631114	0.553302	0.705812
1-year TPs (year 8+)
	To Abs, est	To Abs, lb	To Abs, ub	To Low, est	To Low, lb	To Low, ub	To Med, est	To Med, lb	To Med, ub	To High, est	To High, lb	To High, ub	To Very High, est	To Very High, lb	To Very High, ub
From Abs	0.936322	0.916571	0.954586	0.0636782	0.0454142	0.083429	0	1.05683e-279	1.0001e-05	0	6.95241e-279	5.2483e-06	0	9.14749e-280	6.23695e-06
From Low	0.0227504	0.0104654	0.0387756	0.840178	0.803093	0.873832	0.0199918	0.00893105	0.0354282	0.0822333	0.0588747	0.11024	0.0348465	0.0200243	0.0547515
From Med	0.0102035	0.000174125	0.0408521	0.526907	0.42236	0.626424	0.236948	0.155937	0.324708	0.07067	0.0278474	0.125444	0.155272	0.0920908	0.237218
From High	0.0222702	0.00220885	0.0689991	0.118343	0.0559767	0.200809	0.00965783	5.75417e-05	0.0371989	0.463054	0.349804	0.573574	0.386674	0.274326	0.492563
From Very High	0.196048	0.133773	0.264743	0.0265516	0.00716807	0.0589626	0.305748	0.233066	0.389051	0.030173	0.00876918	0.0660168	0.44148	0.363236	0.52339

## Sheet: 18-35 Hispanic Male
3-year TPs (year 0-3)
	To Abs	To Low	To Med	To High	To Very High
From Abs	0.7534	0.2192	0.0154	0.0034	0.0086
From Low	0.1595	0.7198	0.0444	0.0451	0.0312
From Med	0.1525	0.7231	0.0138	0.0886	0.022
From High	0.1155	0.3935	0.0144	0.1568	0.3198
From Very High	0.1391	0.4524	0.1144	0.0574	0.2367
1-year TPs (year 0-3)
	To Abs, est	To Abs, lb	To Abs, ub	To Low, est	To Low, lb	To Low, ub	To Med, est	To Med, lb	To Med, ub	To High, est	To High, lb	To High, ub	To Very High, est	To Very High, lb	To Very High, ub
From Abs	0.902851	0.879264	0.924727	0.0858711	0.0651382	0.108443	0.00859559	0.0029145	0.0178069	0	7.30015e-261	4.15746e-06	0.00268223	0.000214099	0.00819273
From Low	0.067064	0.043115	0.0918876	0.870894	0.836704	0.90216	0.0217502	0.0102218	0.0368367	0.0402819	0.0233088	0.0609253	1.00003e-05	0	2.48825e-06
From Med	0.0486082	0.0143369	0.100042	0.673607	0.570568	0.761615	0.221946	0.150715	0.31319	0.0558388	0.0187937	0.107205	0	0	1.50511e-14
From High	0.0249764	0.00302479	0.0723748	0.164761	0.0908525	0.255521	0	0	3.59148e-16	0.492773	0.385127	0.602302	0.31749	0.218324	0.43096
From Very High	0.0565427	0.0249714	0.0993087	0.170153	0.110618	0.236626	0.126463	0.0772242	0.184023	0.0328085	0.0106153	0.0657976	0.614032	0.531374	0.694405
1-year TPs (year 3-8)
	To Abs, est	To Abs, lb	To Abs, ub	To Low, est	To Low, lb	To Low, ub	To Med, est	To Med, lb	To Med, ub	To High, est	To High, lb	To High, ub	To Very High, est	To Very High, lb	To Very High, ub
From Abs	0.914425	0.888402	0.935986	0.0656747	0.0468729	0.0876624	0.0099	0.00365133	0.019363	0	6.8453e-289	1.12812e-05	0.01	0.00375214	0.0204765
From Low	0.0456892	0.0285965	0.0673171	0.828473	0.79137	0.86244	0.01	0.00304614	0.0213863	0.0658664	0.0448327	0.0887519	0.0499713	0.0316543	0.0744318
From Med	0.0275636	0.00522693	0.0666104	0.610641	0.504373	0.70362	0.244234	0.160925	0.338278	0.0880818	0.0411707	0.156829	0.0294792	0.00464114	0.0729295
From High	0.0487618	0.0131234	0.111688	0.119049	0.0578674	0.203256	0.0244069	0.00246213	0.0645652	0.438641	0.328325	0.547806	0.369142	0.266899	0.475609
From Very High	0.112462	0.0672356	0.167307	0.0582579	0.0252419	0.101061	0.177428	0.117603	0.24204	0.0208214	0.0039518	0.0464713	0.63103	0.551437	0.705586
1-year TPs (year 8+)
	To Abs, est	To Abs, lb	To Abs, ub	To Low, est	To Low, lb	To Low, ub	To Med, est	To Med, lb	To Med, ub	To High, est	To High, lb	To High, ub	To Very High, est	To Very High, lb	To Very High, ub
From Abs	0.924019	0.901915	0.944801	0.0759807	0.0551994	0.0980833	0	3.99587e-268	9.4146e-06	0	2.02728e-291	9.21836e-06	0	5.19588e-300	7.45761e-06
From Low	0.0234205	0.0108144	0.0402697	0.839283	0.805044	0.870975	0.0199917	0.00927491	0.0346719	0.0824319	0.0589862	0.108241	0.0348729	0.0203968	0.0533973
From Med	0.0102047	0.000198603	0.0414934	0.530665	0.418507	0.632933	0.23315	0.147201	0.330342	0.0706902	0.0283284	0.132504	0.15529	0.090154	0.245946
From High	0.0222709	0.00231321	0.0620865	0.118038	0.0552562	0.202918	0.00965774	8.80889e-05	0.0383313	0.463178	0.3464	0.575428	0.386855	0.28697	0.499365
From Very High	0.196324	0.1369	0.265265	0.0265523	0.00604851	0.0555214	0.306575	0.229991	0.38366	0.0301718	0.0101858	0.0620644	0.440377	0.360944	0.518689

## Sheet: 18-35 Other Male
3-year TPs (year 0-3)
	To Abs	To Low	To Med	To High	To Very High
From Abs	0.5361	0.4365	0.0154	0.0034	0.0086
From Low	0.1595	0.7198	0.0444	0.0451	0.0312
From Med	0.1525	0.7231	0.0138	0.0886	0.022
From High	0.1155	0.3935	0.0144	0.1568	0.3198
From Very High	0.1391	0.4524	0.1144	0.0574	0.2367
1-year TPs (year 0-3)
	To Abs, est	To Abs, lb	To Abs, ub	To Low, est	To Low, lb	To Low, ub	To Med, est	To Med, lb	To Med, ub	To High, est	To High, lb	To High, ub	To Very High, est	To Very High, lb	To Very High, ub
From Abs	0.789826	0.756807	0.822087	0.205168	0.173632	0.238971	0.00400583	0.000675476	0.0102788	0	1.89984e-264	7.42596e-06	0.00100026	4.14242e-06	0.00393899
From Low	0.0769185	0.052833	0.105398	0.860813	0.822471	0.891809	0.0219642	0.0106701	0.0376574	0.0389524	0.0231488	0.0580909	0.00135175	2.58942e-06	0.00594329
From Med	0.0529725	0.0164234	0.104325	0.663821	0.5716	0.763763	0.227591	0.143624	0.316738	0.0556159	0.0176311	0.105001	0	0	2.38552e-16
From High	0.0259697	0.00337489	0.0793231	0.163724	0.0907392	0.250088	2.20289e-17	0	4.72541e-19	0.492562	0.37522	0.602689	0.317744	0.218204	0.42388
From Very High	0.064963	0.0292427	0.110699	0.162573	0.106301	0.230206	0.125118	0.0758772	0.188642	0.0340943	0.0101682	0.0701416	0.613252	0.530738	0.69706
1-year TPs (year 3-8)
	To Abs, est	To Abs, lb	To Abs, ub	To Low, est	To Low, lb	To Low, ub	To Med, est	To Med, lb	To Med, ub	To High, est	To High, lb	To High, ub	To Very High, est	To Very High, lb	To Very High, ub
From Abs	0.797629	0.767312	0.830933	0.182471	0.150747	0.210748	0.0099	0.00345547	0.0188036	0	1.0966e-262	1.12634e-05	0.01	0.00349999	0.0192823
From Low	0.0548562	0.0361385	0.0797736	0.820422	0.784088	0.853409	0.01	0.00325246	0.0209	0.0646671	0.0430652	0.0868795	0.0500545	0.0320147	0.0710121
From Med	0.0316669	0.00581627	0.0801137	0.601437	0.494029	0.699803	0.249581	0.16742	0.346678	0.0877871	0.0384794	0.154327	0.0295275	0.00591093	0.077922
From High	0.049819	0.0135835	0.102196	0.118002	0.0547395	0.192921	0.0244025	0.00258517	0.0704757	0.438397	0.330922	0.544701	0.369379	0.263097	0.478198
From Very High	0.119512	0.0701822	0.181474	0.052931	0.0226149	0.097436	0.176334	0.123305	0.245505	0.0208069	0.00402744	0.0501329	0.630417	0.547819	0.702503
1-year TPs (year 8+)
	To Abs, est	To Abs, lb	To Abs, ub	To Low, est	To Low, lb	To Low, ub	To Med, est	To Med, lb	To Med, ub	To High, est	To High, lb	To High, ub	To Very High, est	To Very High, lb	To Very High, ub
From Abs	0.804064	0.770489	0.836188	0.195936	0.163812	0.229507	0	1.09909e-268	1.20831e-05	0	3.75963e-268	5.49992e-06	0	1.00607e-247	4.95668e-06
From Low	0.0300141	0.0172597	0.0469435	0.832198	0.796767	0.865612	0.0199917	0.00892695	0.0357376	0.0827257	0.0590084	0.109796	0.0350709	0.021338	0.0531842
From Med	0.0102034	0.000239134	0.0402875	0.524789	0.425707	0.616234	0.238134	0.15665	0.330412	0.0709092	0.028726	0.127125	0.155964	0.0929357	0.242758
From High	0.0222733	0.00173181	0.064774	0.116938	0.0570594	0.200789	0.00966132	9.60774e-05	0.0369704	0.463499	0.35446	0.578325	0.387628	0.276713	0.494871
From Very High	0.20328	0.140595	0.277279	0.0265687	0.00626721	0.0597534	0.303375	0.231064	0.38078	0.0301677	0.00816976	0.0641585	0.436609	0.357029	0.512768

## Sheet: 18-35 White Female
3-year TPs (year 0-3)
	To Abs	To Low	To Med	To High	To Very High
From Abs	0.7219	0.2507	0.0154	0.0034	0.0086
From Low	0.3059	0.5259	0.0723	0.0348	0.0611
From Med	0.0793	0.5161	0.1608	0.2218	0.022
From High	0.1868	0.3315	0.1489	0.0596	0.2732
From Very High	0.3197	0.22	0.2087	0.1357	0.1159
1-year TPs (year 0-3)
	To Abs, est	To Abs, lb	To Abs, ub	To Low, est	To Low, lb	To Low, ub	To Med, est	To Med, lb	To Med, ub	To High, est	To High, lb	To High, ub	To Very High, est	To Very High, lb	To Very High, ub
From Abs	0.879975	0.853102	0.903899	0.117931	0.0939483	0.144117	0.00209435	0.000138273	0.00729356	0	9.14005e-278	1.26895e-05	0	2.20607e-257	4.26824e-06
From Low	0.135737	0.105215	0.169502	0.770089	0.728063	0.806923	0.0397043	0.0234092	0.0607492	0.0354361	0.0215313	0.0540317	0.0190339	0.00825587	0.0332459
From Med	0	0	4.28828e-18	0.313104	0.221541	0.414176	0.492658	0.382951	0.587442	0.194238	0.12471	0.282308	0	0	6.82589e-15
From High	0	0	4.13714e-23	0.256452	0.164535	0.356692	0	0	8.01697e-21	0.432161	0.323669	0.545839	0.311387	0.215225	0.421234
From Very High	0.20641	0.14565	0.271655	1.00465e-05	0	1.04366e-09	0.286803	0.213845	0.363035	0.00817054	0.000391335	0.0268561	0.498607	0.422783	0.585931
1-year TPs (year 3-8)
	To Abs, est	To Abs, lb	To Abs, ub	To Low, est	To Low, lb	To Low, ub	To Med, est	To Med, lb	To Med, ub	To High, est	To High, lb	To High, ub	To Very High, est	To Very High, lb	To Very High, ub
From Abs	0.883794	0.854507	0.909524	0.0963055	0.0736794	0.124136	0.0099	0.00324336	0.0194453	0	1.1552e-274	2.46536e-06	0.01	0.00407909	0.0199609
From Low	0.1117	0.085079	0.14227	0.753833	0.709405	0.790467	0.01	0.00317345	0.0228712	0.063201	0.0422942	0.088092	0.061266	0.040204	0.0868395
From Med	0.0114242	0.000299157	0.0392777	0.259462	0.171388	0.353224	0.48402	0.386949	0.586429	0.21498	0.138619	0.305871	0.0301142	0.00577519	0.0774991
From High	0.0325554	0.00514208	0.087086	0.207461	0.119823	0.302349	0.02403	0.00256596	0.0639761	0.377162	0.271362	0.496032	0.358793	0.254194	0.468192
From Very High	0.221655	0.159079	0.285756	0.0101623	0.000694082	0.0321293	0.292331	0.224182	0.371286	0.0191655	0.00366068	0.0461252	0.456686	0.378271	0.534722
1-year TPs (year 8+)
	To Abs, est	To Abs, lb	To Abs, ub	To Low, est	To Low, lb	To Low, ub	To Med, est	To Med, lb	To Med, ub	To High, est	To High, lb	To High, ub	To Very High, est	To Very High, lb	To Very High, ub
From Abs	0.892389	0.866067	0.916478	0.107611	0.0835213	0.133933	0	2.90547e-259	1.72495e-05	0	3.94688e-263	4.96657e-06	0	1.29978e-268	3.49142e-05
From Low	0.0765501	0.0540916	0.103102	0.779161	0.737063	0.817238	0.0199906	0.00933407	0.0340324	0.0882379	0.0644246	0.117354	0.0360609	0.0209292	0.0542011
From Med	0.010151	0.00017068	0.0375133	0.251339	0.169194	0.352609	0.425728	0.327415	0.530574	0.156218	0.0907409	0.232894	0.156564	0.0907397	0.233395
From High	0.0219172	0.00211732	0.0647433	0.213632	0.131755	0.315754	0.00968482	0.000144391	0.0370343	0.388369	0.27958	0.497408	0.366397	0.26416	0.479688
From Very High	0.280324	0.210188	0.358482	0.0265973	0.00725417	0.0610627	0.398404	0.318473	0.481194	0.0300082	0.0087843	0.062981	0.264667	0.198761	0.343942

## Sheet: 18-35 Black Female
3-year TPs (year 0-3)
	To Abs	To Low	To Med	To High	To Very High
From Abs	0.8442	0.1284	0.0154	0.0034	0.0086
From Low	0.3446	0.4895	0.0648	0.038	0.0631
From Med	0.1978	0.7417	0.0161	0.0224	0.022
From High	0.0523	0.3578	0.0318	0.3662	0.1919
From Very High	0.2933	0.2094	0.3566	0.0521	0.0886
1-year TPs (year 0-3)
	To Abs, est	To Abs, lb	To Abs, ub	To Low, est	To Low, lb	To Low, ub	To Med, est	To Med, lb	To Med, ub	To High, est	To High, lb	To High, ub	To Very High, est	To Very High, lb	To Very High, ub
From Abs	0.938082	0.917043	0.955521	0.0318477	0.0190028	0.0467988	0.0278867	0.0154551	0.0439922	0.00217338	9.01006e-05	0.00717183	1.00001e-05	5.36846e-280	1.77256e-05
From Low	0.145806	0.114498	0.182541	0.796578	0.757961	0.832127	9.93045e-06	0	3.34344e-06	0.0211547	0.0101427	0.0359696	0.0364523	0.0203351	0.0544262
From Med	0	0	2.53731e-17	0.534982	0.43477	0.637859	0.465018	0.362131	0.56523	0	0	2.97515e-14	0	0	1.35454e-13
From High	0	0	1.07853e-14	0.183746	0.105472	0.283146	0	0	1.01276e-21	0.70397	0.591481	0.793148	0.112283	0.0553461	0.196613
From Very High	0.158325	0.102161	0.222628	0	0	9.56551e-11	0.300634	0.233782	0.378465	0.0120157	0.00111585	0.0354432	0.529025	0.449906	0.606672
1-year TPs (year 3-8)
	To Abs, est	To Abs, lb	To Abs, ub	To Low, est	To Low, lb	To Low, ub	To Med, est	To Med, lb	To Med, ub	To High, est	To High, lb	To High, ub	To Very High, est	To Very High, lb	To Very High, ub
From Abs	0.9621	0.945382	0.976047	0.0179997	0.00947481	0.0295053	0.0099	0.00350261	0.0180674	0	1.04329e-259	2.82766e-06	0.01	0.0038986	0.0192712
From Low	0.1173	0.0891149	0.14973	0.749277	0.708067	0.787642	0.01	0.0029761	0.0211048	0.046824	0.0295066	0.0678662	0.0765994	0.0545398	0.104323
From Med	0.011118	0.00032961	0.0411029	0.444949	0.346719	0.538588	0.453309	0.352165	0.559057	0.060678	0.0197341	0.114242	0.0299456	0.00600333	0.08007
From High	0.0356312	0.00683895	0.0903883	0.140674	0.0734689	0.227003	0.0274103	0.00351399	0.0724103	0.642521	0.535978	0.741756	0.153764	0.082034	0.241258
From Very High	0.183609	0.124626	0.244201	0.0101727	0.000750963	0.0325876	0.302822	0.232662	0.376543	0.0192341	0.00394086	0.0468676	0.484163	0.410504	0.567671
1-year TPs (year 8+)
	To Abs, est	To Abs, lb	To Abs, ub	To Low, est	To Low, lb	To Low, ub	To Med, est	To Med, lb	To Med, ub	To High, est	To High, lb	To High, ub	To Very High, est	To Very High, lb	To Very High, ub
From Abs	0.974918	0.960296	0.985677	0.0250819	0.0141246	0.0396503	0	7.12823e-257	7.7194e-06	0	2.93126e-255	8.55512e-06	0	6.6981e-269	2.53431e-05
From Low	0.0814062	0.0579027	0.108026	0.778594	0.741791	0.816536	0.0199954	0.00913754	0.0355205	0.0756013	0.0539015	0.100768	0.0444037	0.0267941	0.0635698
From Med	0.0101393	0.000175074	0.0383752	0.388433	0.294239	0.485012	0.393645	0.29917	0.498631	0.0522661	0.0158814	0.108321	0.155517	0.0893489	0.239673
From High	0.0237423	0.00223724	0.0685815	0.144878	0.0738282	0.236467	0.0129441	0.000291824	0.046087	0.67009	0.564865	0.767876	0.148345	0.0812177	0.228131
From Very High	0.243223	0.179745	0.316538	0.0265194	0.00628314	0.061266	0.41388	0.335798	0.496001	0.0300235	0.00952941	0.0622696	0.286355	0.215452	0.363315

## Sheet: 18-35 Hispanic Female
3-year TPs (year 0-3)
	To Abs	To Low	To Med	To High	To Very High
From Abs	0.8209	0.1517	0.0154	0.0034	0.0086
From Low	0.3446	0.4895	0.0648	0.038	0.0631
From Med	0.1978	0.7417	0.0161	0.0224	0.022
From High	0.0523	0.3578	0.0318	0.3662	0.1919
From Very High	0.2933	0.2094	0.3566	0.0521	0.0886
1-year TPs (year 0-3)
	To Abs, est	To Abs, lb	To Abs, ub	To Low, est	To Low, lb	To Low, ub	To Med, est	To Med, lb	To Med, ub	To High, est	To High, lb	To High, ub	To Very High, est	To Very High, lb	To Very High, ub
From Abs	0.927988	0.906	0.948112	0.0428828	0.0266164	0.059859	0.0281188	0.0159541	0.0434995	0.00100067	4.68522e-06	0.00440787	1.00008e-05	2.39937e-286	1.57839e-05
From Low	0.147359	0.114959	0.183693	0.794978	0.756216	0.833767	1.005e-05	0	1.05501e-05	0.0214947	0.0100241	0.0373671	0.0361587	0.0206354	0.0567738
From Med	0	0	4.3483e-13	0.534433	0.438636	0.634584	0.465567	0.365416	0.561364	0	0	1.55421e-13	0	0	4.34183e-17
From High	0	0	1.55333e-14	0.18307	0.101816	0.284417	0	0	5.2455e-23	0.704519	0.595495	0.800453	0.11241	0.0534657	0.188222
From Very High	0.159611	0.103881	0.228503	0	0	3.31301e-10	0.298743	0.224903	0.371234	0.0120114	0.00120489	0.0358188	0.529635	0.452266	0.607608
1-year TPs (year 3-8)
	To Abs, est	To Abs, lb	To Abs, ub	To Low, est	To Low, lb	To Low, ub	To Med, est	To Med, lb	To Med, ub	To High, est	To High, lb	To High, ub	To Very High, est	To Very High, lb	To Very High, ub
From Abs	0.954952	0.936993	0.96912	0.0251477	0.0145878	0.0383102	0.0099	0.00368333	0.0189429	0	2.7856e-261	1.38752e-05	0.01	0.00367366	0.0194209
From Low	0.118714	0.0912448	0.151549	0.74781	0.708422	0.784678	0.01	0.00329495	0.0199305	0.0471675	0.0293409	0.0688234	0.0763084	0.0539693	0.104147
From Med	0.0111215	0.000440058	0.0406513	0.44445	0.340333	0.545655	0.453799	0.356264	0.560192	0.0606809	0.0221587	0.117035	0.0299482	0.0053024	0.0710782
From High	0.0356387	0.00634729	0.0877815	0.139989	0.0734057	0.222515	0.0274203	0.00374372	0.0766816	0.643032	0.536875	0.743766	0.15392	0.08427	0.242704
From Very High	0.184605	0.125618	0.250436	0.0101719	0.000940197	0.0334236	0.301251	0.22564	0.379273	0.0192354	0.00389933	0.04778	0.484737	0.407201	0.56837
1-year TPs (year 8+)
	To Abs, est	To Abs, lb	To Abs, ub	To Low, est	To Low, lb	To Low, ub	To Med, est	To Med, lb	To Med, ub	To High, est	To High, lb	To High, ub	To Very High, est	To Very High, lb	To Very High, ub
From Abs	0.966895	0.951337	0.979042	0.0331053	0.0209582	0.0483282	0	3.49098e-294	2.16112e-05	0	2.39424e-288	3.66846e-05	0	3.14685e-283	3.68806e-05
From Low	0.0826235	0.0596057	0.110595	0.777181	0.73384	0.8136	0.0199953	0.00877738	0.0347823	0.0759567	0.0536311	0.103521	0.0442434	0.0273418	0.0651527
From Med	0.0101391	0.000228822	0.0401027	0.388032	0.28598	0.485419	0.39404	0.30114	0.501493	0.0522684	0.0165435	0.107635	0.155521	0.090127	0.229909
From High	0.0237493	0.00312071	0.0609125	0.144115	0.0740217	0.23572	0.0129594	0.000500087	0.0463151	0.670637	0.56736	0.77277	0.148539	0.0820067	0.238346
From Very High	0.244364	0.176963	0.323599	0.0265244	0.00698065	0.060341	0.412203	0.335764	0.490639	0.0300241	0.00951431	0.0616462	0.286885	0.213062	0.363469

## Sheet: 18-35 Other Female
3-year TPs (year 0-3)
	To Abs	To Low	To Med	To High	To Very High
From Abs	0.641	0.3316	0.0154	0.0034	0.0086
From Low	0.3446	0.4895	0.0648	0.038	0.0631
From Med	0.1978	0.7417	0.0161	0.0224	0.022
From High	0.0523	0.3578	0.0318	0.3662	0.1919
From Very High	0.2933	0.2094	0.3566	0.0521	0.0886
1-year TPs (year 0-3)
	To Abs, est	To Abs, lb	To Abs, ub	To Low, est	To Low, lb	To Low, ub	To Med, est	To Med, lb	To Med, ub	To High, est	To High, lb	To High, ub	To Very High, est	To Very High, lb	To Very High, ub
From Abs	0.835039	0.803761	0.864548	0.126829	0.100396	0.155763	0.0381316	0.0246951	0.0552183	0	6.81487e-284	1.79405e-05	0	2.56794e-275	5.65389e-06
From Low	0.162514	0.127077	0.198369	0.782044	0.742438	0.820394	9.95103e-06	0	1.74839e-06	0.02057	0.00939383	0.0366682	0.0348626	0.0200996	0.0543586
From Med	0	0	1.72816e-16	0.534557	0.422217	0.635408	0.465443	0.364592	0.577783	0	0	4.44927e-16	0	0	9.79992e-15
From High	0	0	1.49739e-18	0.18354	0.106896	0.27648	0	0	5.29816e-28	0.704809	0.601704	0.794919	0.111651	0.0532878	0.187845
From Very High	0.172091	0.116191	0.234191	2.79923e-17	0	5.5467e-11	0.279822	0.213907	0.353098	0.0120703	0.000999812	0.035811	0.536017	0.45451	0.616331
1-year TPs (year 3-8)
	To Abs, est	To Abs, lb	To Abs, ub	To Low, est	To Low, lb	To Low, ub	To Med, est	To Med, lb	To Med, ub	To High, est	To High, lb	To High, ub	To Very High, est	To Very High, lb	To Very High, ub
From Abs	0.871145	0.84181	0.896324	0.108955	0.0852479	0.135828	0.0099	0.00355246	0.0191442	0	7.55122e-303	1.39231e-05	0.01	0.00349667	0.0199737
From Low	0.132563	0.102702	0.167578	0.736061	0.690879	0.774183	0.01	0.0030881	0.0211556	0.046351	0.028697	0.0687356	0.0750244	0.0526091	0.101241
From Med	0.0111207	0.000229	0.040152	0.444562	0.34558	0.543954	0.453689	0.348455	0.55515	0.0606803	0.0217959	0.116126	0.0299476	0.00546936	0.0750716
From High	0.0356465	0.00735495	0.0833278	0.140482	0.0719469	0.224845	0.0274282	0.00394032	0.0763938	0.643339	0.534911	0.74158	0.153105	0.0818316	0.241937
From Very High	0.19426	0.138821	0.260154	0.0101641	0.000671038	0.0324289	0.285581	0.215672	0.359139	0.0192485	0.00392542	0.0461663	0.490747	0.416033	0.567799
1-year TPs (year 8+)
	To Abs, est	To Abs, lb	To Abs, ub	To Low, est	To Low, lb	To Low, ub	To Med, est	To Med, lb	To Med, ub	To High, est	To High, lb	To High, ub	To Very High, est	To Very High, lb	To Very High, ub
From Abs	0.879384	0.851631	0.902713	0.120616	0.0972873	0.148331	0	2.56208e-278	7.4772e-06	0	2.61907e-297	3.6125e-05	0	2.1194e-254	1.94638e-05
From Low	0.0943821	0.0683442	0.12134	0.766007	0.723994	0.805165	0.0199952	0.00861768	0.0349571	0.0759096	0.0537266	0.0997093	0.0437063	0.0264065	0.0646354
From Med	0.0101392	0.000202917	0.0425893	0.388122	0.288773	0.498001	0.393951	0.294626	0.497392	0.0522679	0.0172872	0.102654	0.15552	0.0883213	0.233477
From High	0.0237528	0.00234004	0.0629754	0.144693	0.076254	0.223113	0.0129707	0.000409363	0.0466363	0.670958	0.572799	0.774103	0.147626	0.0774982	0.231141
From Very High	0.255536	0.191627	0.329085	0.0265718	0.00690482	0.0607223	0.395492	0.323682	0.476236	0.0300296	0.00985061	0.0696635	0.292371	0.218295	0.369516

## Sheet: 36-50 White Male
3-year TPs (year 0-3)
	To Abs	To Low	To Med	To High	To Very High
From Abs	0.8168	0.1558	0.0154	0.0034	0.0086
From Low	0.1854	0.5982	0.0771	0.0565	0.0828
From Med	0.0377	0.3554	0.2119	0.373	0.022
From High	0.0913	0.2588	0.2152	0.0565	0.3782
From Very High	0.1478	0.14	0.0241	0.2251	0.463
1-year TPs (year 0-3)
	To Abs, est	To Abs, lb	To Abs, ub	To Low, est	To Low, lb	To Low, ub	To Med, est	To Med, lb	To Med, ub	To High, est	To High, lb	To High, ub	To Very High, est	To Very High, lb	To Very High, ub
From Abs	0.928965	0.907328	0.947358	0.0659183	0.0478905	0.0860603	0.0033093	0.000387037	0.00915332	0	4.0717e-279	1.43782e-05	0.00180695	5.13932e-05	0.00672398
From Low	0.0763766	0.0526591	0.102756	0.823177	0.786814	0.859365	0.047509	0.0292626	0.0692498	0.0244195	0.0122111	0.0421974	0.0285177	0.0155791	0.0468247
From Med	0	0	8.55865e-14	0.161785	0.0910739	0.239559	0.548589	0.448785	0.649526	0.289626	0.19798	0.39253	0	0	3.56812e-17
From High	0.0164083	0.000871388	0.0580093	0.159564	0.0863324	0.256474	0.145864	0.0729712	0.236502	0.418614	0.304387	0.53524	0.25955	0.169048	0.369707
From Very High	0.0627942	0.0299562	0.105533	0.0382604	0.0134217	0.0735487	0.0115821	0.00118214	0.0346124	0.145538	0.0938615	0.208072	0.741825	0.670578	0.808022
1-year TPs (year 3-8)
	To Abs, est	To Abs, lb	To Abs, ub	To Low, est	To Low, lb	To Low, ub	To Med, est	To Med, lb	To Med, ub	To High, est	To High, lb	To High, ub	To Very High, est	To Very High, lb	To Very High, ub
From Abs	0.934259	0.91285	0.952049	0.0458408	0.0307826	0.0640347	0.0099	0.00341124	0.0195609	0	4.30415e-278	5.68769e-06	0.01	0.00361731	0.0198444
From Low	0.0557204	0.0367064	0.0786246	0.811094	0.774165	0.846538	0.01	0.00269141	0.0229569	0.0518685	0.0326126	0.0752851	0.0713175	0.0487807	0.0976895
From Med	0.0118124	0.000362193	0.0404996	0.12504	0.0662172	0.196791	0.53182	0.431099	0.626054	0.301046	0.217953	0.402734	0.0302805	0.0062669	0.0743766
From High	0.0395195	0.00861161	0.0888337	0.114951	0.0528434	0.198927	0.168272	0.0932581	0.260709	0.370108	0.267209	0.479738	0.307149	0.206445	0.407835
From Very High	0.108265	0.0622682	0.165072	0.0101177	0.000595011	0.0307905	0.0742636	0.0359375	0.12321	0.087534	0.0465763	0.136556	0.71982	0.641737	0.791289
1-year TPs (year 8+)
	To Abs, est	To Abs, lb	To Abs, ub	To Low, est	To Low, lb	To Low, ub	To Med, est	To Med, lb	To Med, ub	To High, est	To High, lb	To High, ub	To Very High, est	To Very High, lb	To Very High, ub
From Abs	0.944725	0.926384	0.962026	0.0552755	0.0379743	0.0735664	0	1.08179e-275	2.78631e-05	0	2.69068e-294	3.43083e-06	0	1.04772e-288	2.0485e-05
From Low	0.0312644	0.0169876	0.0498206	0.836725	0.797638	0.87052	0.0199941	0.0087644	0.034799	0.0744542	0.0516972	0.101774	0.0375622	0.0219843	0.0561485
From Med	0.010146	0.000262627	0.0411302	0.152495	0.0884409	0.241293	0.467353	0.368702	0.567536	0.213442	0.133253	0.301892	0.156563	0.0886754	0.234766
From High	0.022091	0.0024291	0.0686318	0.112228	0.0538042	0.188805	0.167168	0.0952476	0.256921	0.384626	0.286486	0.49612	0.313887	0.205492	0.415539
From Very High	0.19651	0.138322	0.267922	0.0267068	0.00711438	0.0568097	0.179518	0.119926	0.245903	0.0981432	0.0545077	0.152595	0.499122	0.417805	0.585288

[truncated: 15 more sheets: 36-50 Black Male, 36-50 Hispanic Male, 36-50 Other Male, 36-50 White Female, 36-50 Black Female, 36-50 Hispanic Female, 36-50 Other Female, 51+ White Male, 51+ Black Male, 51+ Hispanic Male, 51+ Other Male, 51+ White Female, 51+ Black Female, 51+ Hispanic Female, 51+ Other Female]
